# Supplementary material
Source: Springer Nature journal article supplement (https://www.springermedizin.de/resource/supplementary/13256_2009_1336_MOESM3_ESM.pdf/9647524)

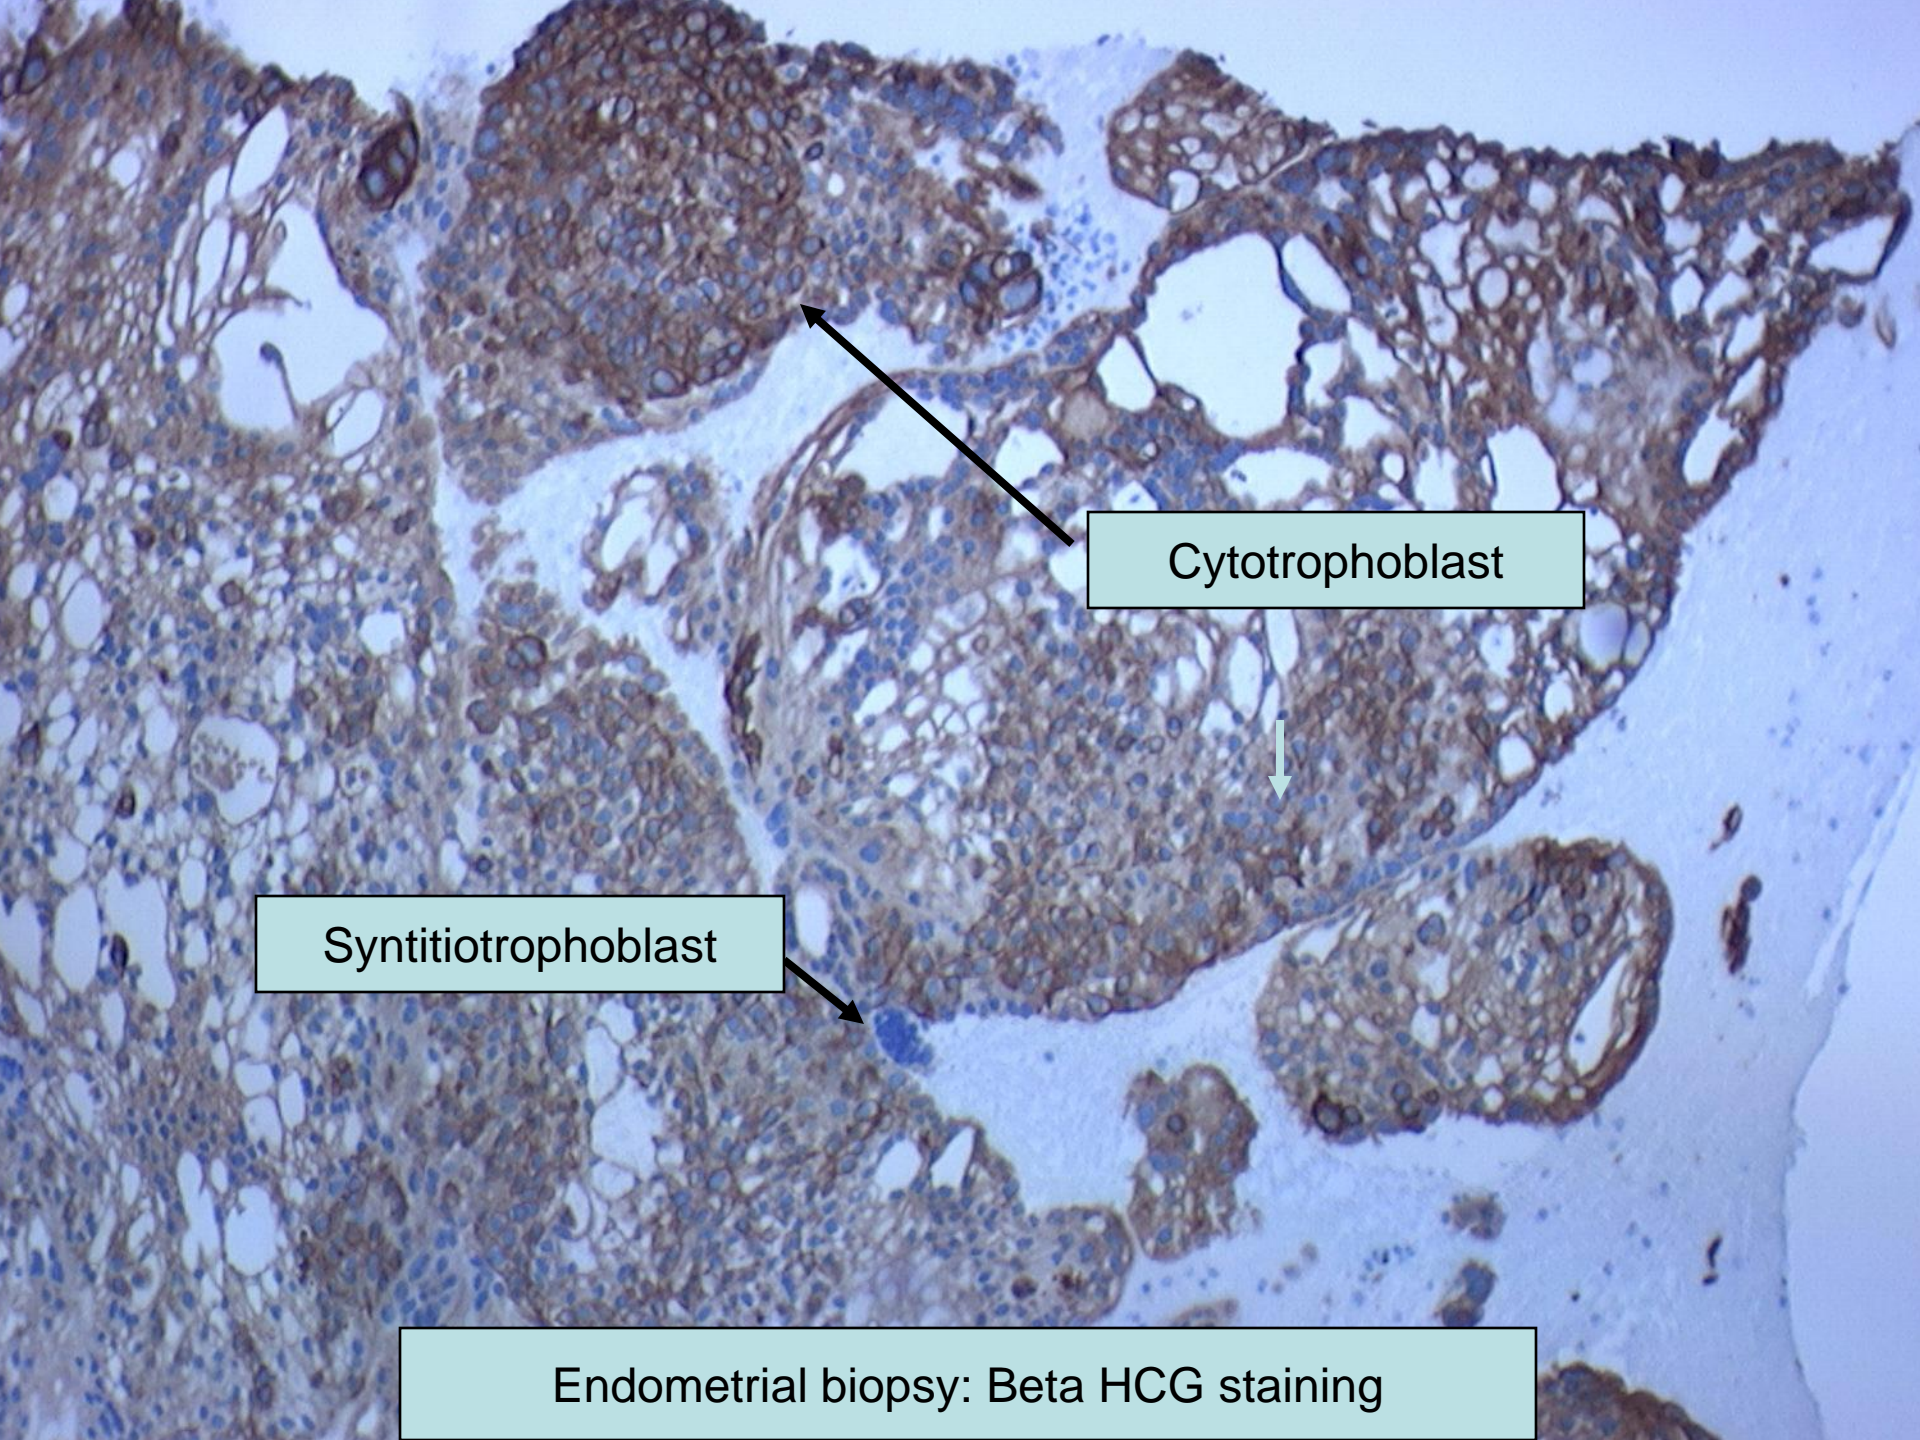

Cytotrophoblast

Syntiotrophoblast

Endometrial biopsy: Beta HCG staining

Supplement: MOESM3 [file 9647524]
